# Supplementary material for: The Relationship Between Delirium and Statin Use According To Disease Severity in Patients in the Intensive Care Unit
Source: Research Square preprint supplement (doi:10.21203/rs.3.rs-1109818/v1), 2021-12-02
Supplement: Supplementary file 2 [file 32c1c160bda5fc0cdb4ee4f5.docx]

**Supplement Table 1.** Additional data on the demographical and clinical characteristics of the patients

|  | Total | Group 1  (N = 678) | Group 2  (N= 1708) | Group 3  (N = 934) | Group 4  (N = 284) |
| --- | --- | --- | --- | --- | --- |
| Emergent admission, no. (%) | 2299 (63.8) | 430 (63.4) | 1043 (61.1) | 594 (63.6) | 232 (81.7) |
| Subdivision of surgical Hospitalization, no. | | | | | |
| Admission for surgical problem, no. (%) | 2425 (67.3) | 431 (63.6) | 1123 (65.7) | 637 (68.2) | 234 (82.4) |
| Cardiovascular surgery | 1019 | 148 | 382 | 331 | 158 |
| Colorectal surgery | 302 | 71 | 148 | 62 | 21 |
| Hepatobiliary &  Pancreatic surgery | 270 | 58 | 166 | 38 | 8 |
| Neurosurgery | 218 | 58 | 91 | 60 | 9 |
| Orthopedic surgery | 215 | 24 | 148 | 32 | 11 |
| Chest surgery | 85 | 13 | 29 | 35 | 8 |
| Transplantation, Trauma & Critical care surgery | 74 | 15 | 32 | 19 | 8 |
| Thyroid & Endocrine surgery | 54 | 8 | 22 | 22 | 2 |
| Gastrointestinal surgery | 48 | 12 | 22 | 8 | 6 |
| Obstetrics and Gynecology | 42 | 10 | 24 | 8 | 0 |
| Urology | 31 | 4 | 23 | 4 | 0 |
| Otorhinolaryngology | 25 | 2 | 12 | 10 | 1 |
| Breast surgery | 16 | 4 | 10 | 1 | 1 |
| Othersa | 26 | 4 | 14 | 7 | 1 |
| Details about delirium | | | | | |
| Delirium diagnosis, no. (%) | 1219 (33.8) | 114 (16.8) | 509 (29.8) | 418 (44.8) | 178 (62.7) |
| Duration of delirium (d), median /mean (SD) | 3.0 / 5.6 (7.9) | 2.0 / 4.4 (4.9) | 3.0 / 4.8 (7.6) | 3.0 / 5.9 (8.1) | 5.0 / 7.5 (9.4) |
| Type (Hyperactive/ Hypoactive/ Mixed) of delirium, no. (%) | 314 (25.8) / 526 (43.2) / 379 (31.1) | 36 (31.6) / 48 (42.1) / 30 (26.3) | 147 (28.9) / 205 (40.3) / 157 (30.8) | 95 (22.7) / 196 (46.9) / 127 (30.4) | 36 (20.2) / 77 (43.3) / 65 (36.5) |

**Notes:** a General surgery, Oral and Maxillofacial surgery, Plastic and Reconstructive surgery, Pediatric surgery, Ophthalmology
